# Supplementary material
Source: publisher figshare collection journal article supplement (https://springernature.figshare.com/ndownloader/files/20078129)
Supplement: Supplementary file [file 20078129]

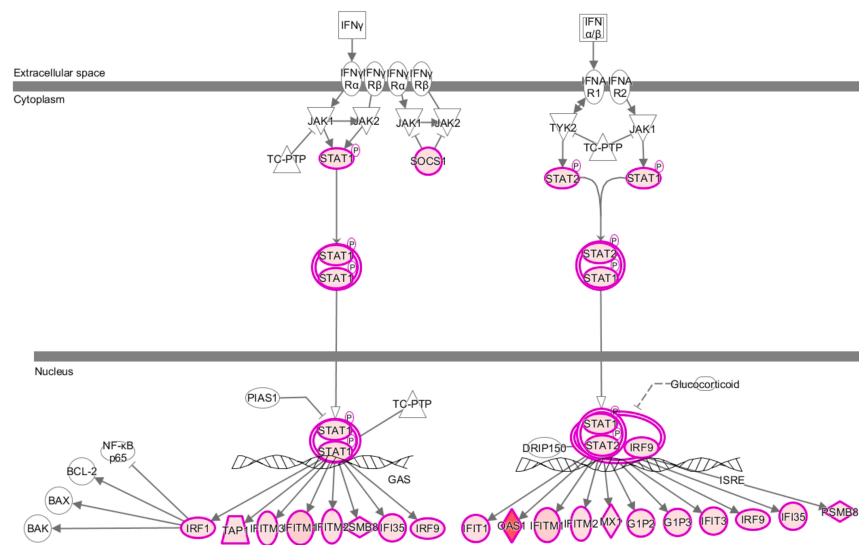

The figure shows the interferon-response signaling cascade induced in hfcMS

The figure shows the interferon-response signaling cascade induced in hfcMSCs upon IFN $\gamma$  stimulation, where transcription of a number of interferon-inducible genes was mediated by JAK/STAT signaling.
